# Supplementary material for: Evaluation of Four Different Analytical Tools to Determine the Regional Origin of Gastrodia elata and Rehmannia glutinosa on the Basis of Metabolomics Study
Source: MDPI journal article supplement (doi:10.3390/molecules19056294), 2014-05-16

## Supplementary Materials

**Figure S1.** Overlaid all FT-NIR spectra of *G. elata* (a) and *R. glutinosa* (b) (not colored as their origin).

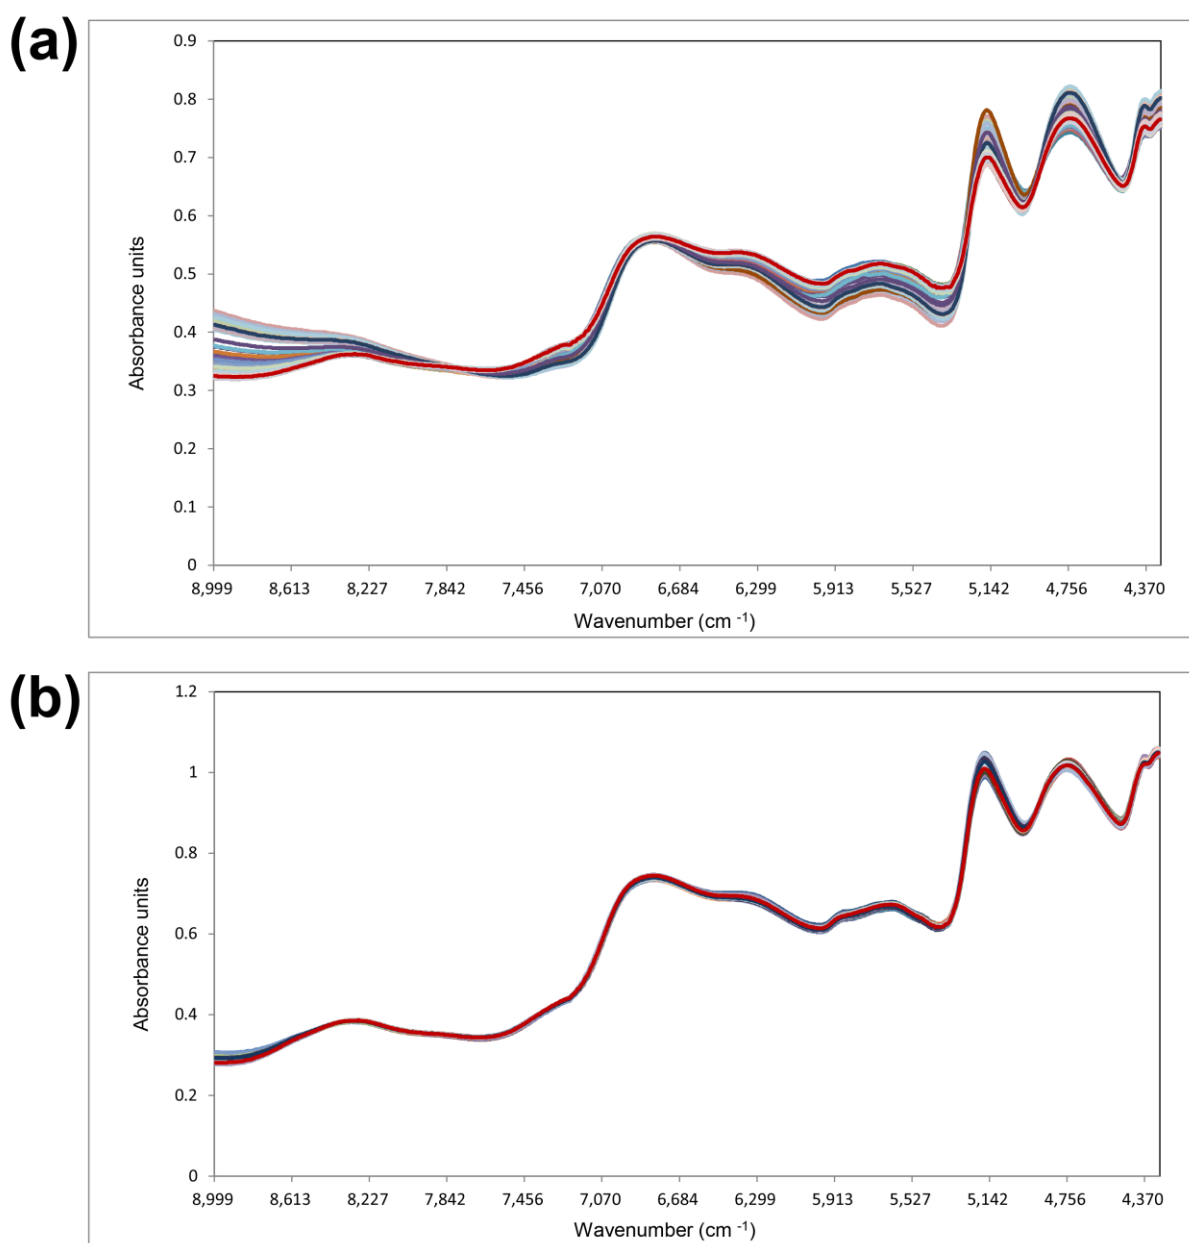

**Figure S2.** Overlaid all  $^1\text{H}$ -NMR spectra of *G. elata* (a) and *R. glutinosa* (b).

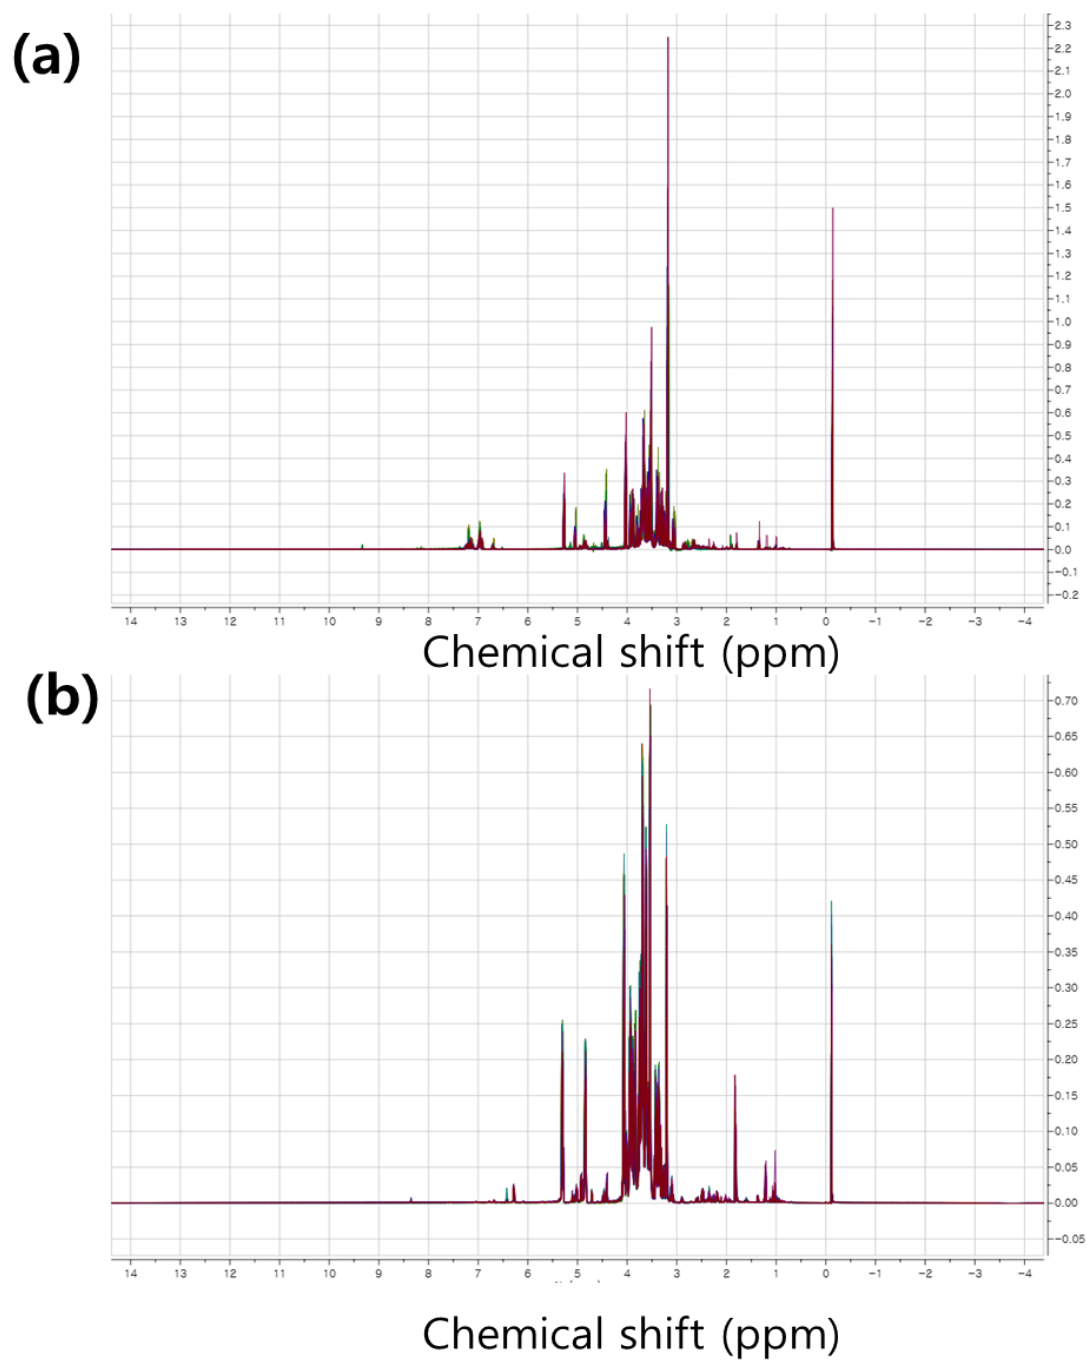

**Figure S3.** Overlaid all total ion chromatograms of *G. elata* (a) and *R. glutinosa* (b) acquired by LC-MS analysis.

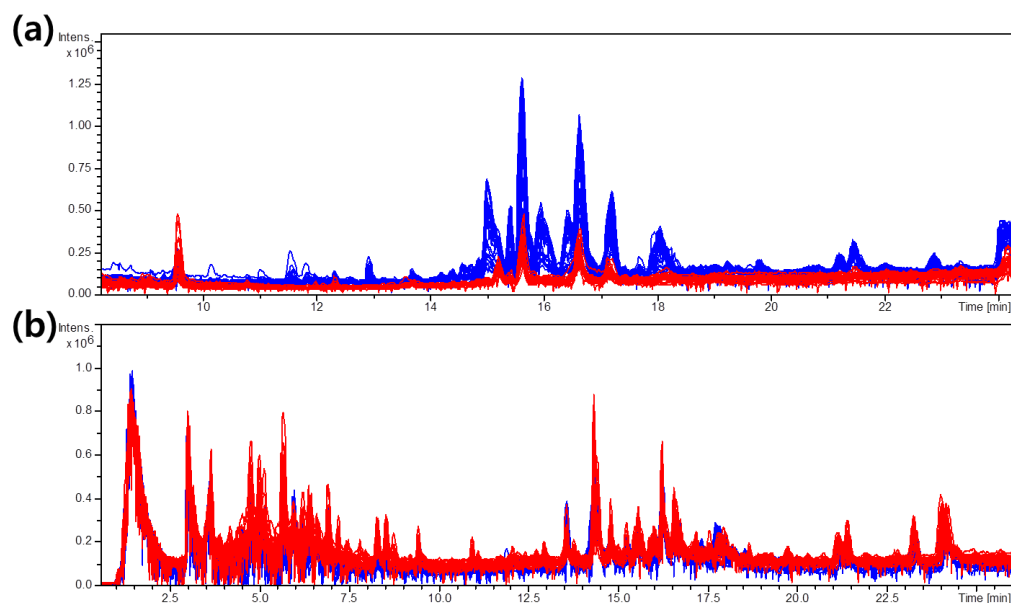

**Figure S4.** Overlaid all total ion chromatograms of *G. elata* (a) and *R. glutinosa* (b) acquired by GC-MS analysis.

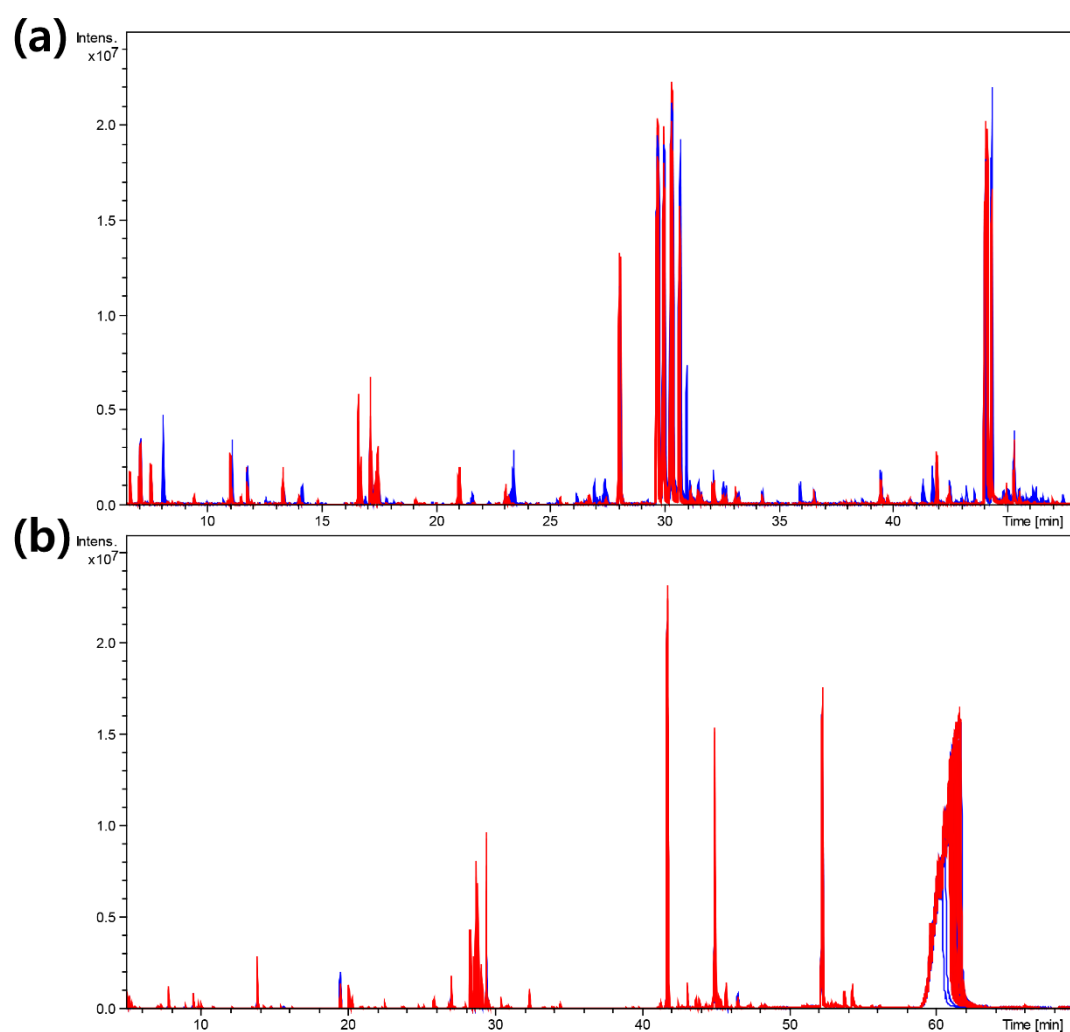

Supplement: s1 [file s1]
